# Supplementary material for: Hematological Effects and Benchmark Doses of Long-Term Co-Exposure to Benzene, Toluene, and Xylenes in a Follow-Up Study on Petrochemical Workers
Source: MDPI journal article supplement (doi:10.3390/toxics10090502), 2022-08-28
Supplement: s1 [file s1]

## Supplementary material

# **Hematological Effects and Benchmark Doses of Long-Term Co-Exposure to Benzene, Toluene, and Xylenes in a Follow-Up Study on Petrochemical Workers**

Zhaorui Zhang<sup>†</sup>, Xin Liu<sup>†</sup>, Chaofan Guo, Xinjie Zhang, Yingying Zhang, Na Deng, Guanchao Lai, Aichu Yang, Yongshun Huang, Shanfeng Dang, Yanqun Zhu, Xiumei Xing, Yongmei Xiao<sup>‡</sup>, and Qifei Deng<sup>‡</sup>

<sup>†</sup>These authors contributed equally to this work.

<sup>‡</sup>These authors jointly supervised this work.

**Table S1.** Information for ambient BTX monitoring in workplaces in three years before the baseline stage.

| Number of equipment releasing BTX in a workplace | Number of workplaces | Number of sampling point(s) for each workplace <sup>a</sup> | Sampling frequency during three years                                                  | Total number of duplicate air samples | No. (%) < LOD <sup>b</sup> |           |           |
|--------------------------------------------------|----------------------|-------------------------------------------------------------|----------------------------------------------------------------------------------------|---------------------------------------|----------------------------|-----------|-----------|
|                                                  |                      |                                                             |                                                                                        |                                       | Benzene                    | Toluene   | Xylene    |
| 1-3                                              | 22                   | 1                                                           | 4 seasons×1.5 years for one newly constructed workplace; 4 seasons ×3 years for others | 258                                   | 24 (9.30)                  | 21 (8.14) | 19 (7.36) |
| 4-10                                             | 9                    | 2                                                           | 4 seasons ×3 years                                                                     | 216                                   | 10 (4.63)                  | 11 (5.09) | 7 (3.24)  |
| >10                                              | 1                    | 3                                                           | 4 seasons ×3 years                                                                     | 36                                    | 2 (5.56)                   | 1 (2.78)  | 1 (2.78)  |
| Total                                            | 32                   |                                                             |                                                                                        | 510                                   | 36 (7.06)                  | 33 (6.47) | 27 (5.29) |

Abbreviations: LOD, limit of detection.

<sup>a</sup>If there are more than 10 equipment releasing BTX components in a workplace, 3 sampling points were set up for each workplace; if there are 4-10 equipment releasing BTX components, 2 sampling points were set up; and if there are 1-3 equipment releasing BTX components, 1 sampling point weas set up.

<sup>b</sup> Number (percentage) of samples with concentrations below LOD;

**Table S2.** Normal range of hematologic parameters according to WS/T 405-2012.

| Hematologic parameters | Normal range in Chinese adults                                         |
|------------------------|------------------------------------------------------------------------|
| WBC counts             | 3.5-9.5 ×10 <sup>9</sup> /L                                            |
| Neutrophil counts      | 1.8-6.3 ×10 <sup>9</sup> /L                                            |
| Monocyte counts        | 0.1-0.6 ×10 <sup>9</sup> /L                                            |
| Lymphocyte counts      | 1.1-3.2 ×10 <sup>9</sup> /L                                            |
| RBC counts             | Male: 4.3-5.8×10 <sup>12</sup> /L; Female: 3.8-5.1×10 <sup>12</sup> /L |
| Hemoglobin             | Male: 130-175 g/L; Female: 115-150 g/L                                 |
| Hematocrit             | Male: 40%-50%; Female: 35%-45%                                         |
| Platelet counts        | 120-350 ×10 <sup>9</sup> /L                                            |
| MPV                    | None                                                                   |

**Table S3.** Incidence proportion of hematological damages in subgroups with different BTX CE levels.

| CE ranges<br>(mg/m <sup>3</sup> ×year) | Median CE levels<br>(mg/m <sup>3</sup> ×year) | n   | Number<br>of cases | Incidence proportion (%) |
|----------------------------------------|-----------------------------------------------|-----|--------------------|--------------------------|
| <b>Benzene</b>                         |                                               |     |                    |                          |
| <0.25                                  | 0.142                                         | 126 | 17                 | 13.49                    |
| 0.25~0.40                              | 0.327                                         | 156 | 28                 | 17.95                    |
| 0.40-0.525                             | 0.477                                         | 122 | 18                 | 14.75                    |
| 0.525-0.75                             | 0.637                                         | 186 | 28                 | 15.05                    |
| 0.75-0.90                              | 0.831                                         | 120 | 24                 | 20.00                    |
| 0.90-1.20                              | 1.050                                         | 180 | 32                 | 17.78                    |
| 1.20-2.00                              | 1.341                                         | 93  | 11                 | 11.83                    |
| >2.00                                  | 2.551                                         | 71  | 13                 | 18.31                    |
| <b>Toluene</b>                         |                                               |     |                    |                          |
| <0.30                                  | 0.161                                         | 146 | 12                 | 8.22                     |
| 0.30-0.60                              | 0.470                                         | 140 | 19                 | 13.57                    |
| 0.60-0.80                              | 0.662                                         | 199 | 39                 | 19.60                    |
| 0.80-1.10                              | 0.929                                         | 192 | 32                 | 16.67                    |
| 1.10-1.40                              | 1.210                                         | 189 | 26                 | 13.76                    |
| 1.40-1.90                              | 1.580                                         | 114 | 32                 | 28.07                    |
| >1.90                                  | 2.470                                         | 74  | 11                 | 14.86                    |
| <b>Xylene</b>                          |                                               |     |                    |                          |

|           |       |     |    |       |
|-----------|-------|-----|----|-------|
| <0.30     | 0.164 | 95  | 10 | 10.53 |
| 0.30-0.60 | 0.420 | 122 | 8  | 6.56  |
| 0.60-0.80 | 0.700 | 92  | 7  | 7.61  |
| 0.80-1.10 | 0.875 | 123 | 12 | 9.76  |
| 1.10-1.60 | 1.342 | 173 | 24 | 13.87 |
| 1.60-2.10 | 1.861 | 144 | 29 | 20.14 |
| 2.10-3.10 | 2.561 | 142 | 34 | 23.94 |
| >3.10     | 3.582 | 163 | 47 | 28.83 |

---

**Table S4.** The correlation <sup>a</sup> of 8h-TWA concentrations of BTX components.

| BTX components | Toluene | Xylene  |
|----------------|---------|---------|
| Benzene        | 0.502** | 0.445** |
| Toluene        | -       | 0.440** |

<sup>a</sup>Spearman' s rank correlation test;

\*\*  $P < 0.001$ .

**Table S5.** Decline in hematologic parameters in subjects with different general characteristics.

| Decline in<br>hematologic<br>parameters <sup>a</sup> | Age                        |                      | Sex               |                 | Smoking status       |                   | Drinking status       |                    | BMI                              |                                  |
|------------------------------------------------------|----------------------------|----------------------|-------------------|-----------------|----------------------|-------------------|-----------------------|--------------------|----------------------------------|----------------------------------|
|                                                      | ≤40 years<br>(n=573)       | >40 years<br>(n=481) | Female<br>(n=238) | Male<br>(n=816) | Nonsmoker<br>(n=711) | Smoker<br>(n=343) | Nondrinker<br>(n=561) | Drinker<br>(n=493) | <24 kg/m <sup>2</sup><br>(n=646) | ≥24 kg/m <sup>2</sup><br>(n=408) |
| WBC                                                  | 4.0×10 <sup>-3</sup> ±2.88 | 0.18±1.39            | 0.18±1.22         | 0.05±2.58       | 0.05±2.63            | 0.13±1.57         | 0.13±1.37             | 0.02±3.12          | 0.02±2.82                        | 0.17±1.34                        |
| Neutrophils                                          | -0.04±1.08                 | -0.03±0.97           | -0.03±1.00        | -0.04±1.04      | -0.04±1.00           | -0.03±1.09*       | -0.01±1.03            | -0.06±1.03         | -0.04±1.01                       | -0.02±1.06                       |
| Monocytes                                            | 0.12±0.18                  | 0.18±0.25            | 0.12±0.17         | 0.16±0.23*      | 0.13±0.20            | 0.19±0.25**       | 0.14±0.21             | 0.16±0.22          | 0.14±0.21                        | 0.17±0.22                        |
| Lymphocytes                                          | 0.10±0.54                  | 0.20±0.54*           | 0.18±0.41         | 0.14±0.57**     | 0.13±0.52            | 0.18±0.57*        | 0.14±0.52             | 0.15±0.56          | 0.16±0.53                        | 0.13±0.56*                       |
| RBC                                                  | 0.01±0.38                  | 0.16±0.38            | 0.01±0.35         | 0.10±0.40       | 0.07±0.39            | 0.10±0.39         | 0.07±0.40             | 0.08±0.37          | 0.08±0.39                        | 0.08±0.39                        |
| Hemoglobin                                           | 6.17±13.92                 | 11.02±13.29          | 6.50±13.52        | 8.88±13.90**    | 8.09±13.80           | 8.88±13.95        | 8.36±14.05            | 8.31±13.63         | 8.14±13.74                       | 8.64±14.01                       |
| Hematocrit                                           | -0.54±3.61                 | 1.00±4.10            | -0.07±4.43        | 0.20±3.74**     | 0.14±4.02            | 0.13±3.65         | 0.21±4.15             | 0.06±3.60          | 0.19±3.98                        | 0.06±3.79*                       |
| Platelet                                             | -0.82±38.22                | 4.94±37.66           | -2.69±38.28       | 2.98±37.93**    | 0.73±38.54           | 3.76±37.01        | 2.10±39.20            | 1.24±36.75         | 1.43±39.69                       | 2.12±35.49                       |
| MPV                                                  | 0.41±0.70                  | 0.60±0.78            | 0.46±0.70         | 0.51±0.75       | 0.51±0.75            | 0.47±0.72         | 0.49±0.71             | 0.51±0.77          | 0.51±0.77                        | 0.48±0.70                        |

Note: Abbreviation: WBC, white blood cell; RBC, red blood cell; MPV, mean platelet volume.

<sup>a</sup> Values of variables were shown by mean± SD.

The between-group differences in decline in hematologic parameters were analyzed by multivariable covariance analysis, with adjustment for age, sex, factory location, BMI, smoking status, pack-years of smoking, drinking status, and/or the corresponding baseline hematologic parameters, when appropriate.

\* *P* < 0.05; \*\* *P* < 0.001.

**Table S6.** Associations of BTX CE levels with decline in hematologic parameters stratified by the corresponding baseline hematologic parameters.

| Decline in hematologic parameters | Groups of baseline parameters <sup>a</sup> | Benzene                |                      |                            | Toluene                               |                      |                            | Xylene                                 |                      |                            |
|-----------------------------------|--------------------------------------------|------------------------|----------------------|----------------------------|---------------------------------------|----------------------|----------------------------|----------------------------------------|----------------------|----------------------------|
|                                   |                                            | $\beta$ (95% CI)       | $P_{\text{trend}}^b$ | $P_{\text{interaction}}^c$ | $\beta$ (95% CI)                      | $P_{\text{trend}}^b$ | $P_{\text{interaction}}^c$ | $\beta$ (95% CI)                       | $P_{\text{trend}}^b$ | $P_{\text{interaction}}^c$ |
| WBC                               | Low                                        | -0.027 (-0.156, 0.102) | 0.677                | 0.360                      | -0.088 (-0.239, 0.063)                | 0.254                | 0.383                      | -0.083 (-0.254, 0.088)                 | 0.336                | 0.741                      |
|                                   | Medium                                     | 0.161 (-0.388, 0.710)  | 0.566                |                            | 0.128 (-0.417, 0.673)                 | 0.644                |                            | 0.132 (-0.550, 0.814)                  | 0.704                |                            |
|                                   | High                                       | -0.003 (-0.199, 0.193) | 0.974                |                            | -0.032 (-0.240, 0.176)                | 0.762                |                            | 0.037 (-0.212, 0.286)                  | 0.769                |                            |
| Neutrophils                       | Low                                        | 0.029 (-0.079, 0.137)  | 0.591                | 0.632                      | -0.013 (-0.127, 0.101)                | 0.828                | 0.744                      | -0.036 (-0.167, 0.095)                 | 0.591                | 0.891                      |
|                                   | Medium                                     | 0.016 (-0.076, 0.108)  | 0.736                |                            | 0.017 (-0.089, 0.123)                 | 0.744                |                            | 0.017 (-0.114, 0.148)                  | 0.800                |                            |
|                                   | High                                       | -0.047 (-0.251, 0.157) | 0.651                |                            | -0.098 (-0.304, 0.108)                | 0.348                |                            | -0.074 (-0.319, 0.171)                 | 0.552                |                            |
| Monocytes                         | Low                                        | 0.015 (0.001, 0.029)   | 0.034                | 0.008                      | 0.009 (-0.005, 0.023)                 | 0.235                | 8.70×10 <sup>-5</sup>      | 0.011 (-0.007, 0.029)                  | 0.226                | 2.56×10 <sup>-9</sup>      |
|                                   | Medium                                     | 0.004 (-0.010, 0.018)  | 0.599                |                            | 1.98×10 <sup>-4</sup> (-0.015, 0.016) | 0.980                |                            | -0.006 (-0.024, 0.012)                 | 0.517                |                            |
|                                   | High                                       | 0.026 (-0.009, 0.061)  | 0.152                |                            | 0.021 (-0.020, 0.062)                 | 0.320                |                            | 0.053 (0.004, 0.102)                   | 0.034                |                            |
| Lymphocytes                       | Low                                        | 0.035 (-0.022, 0.092)  | 0.219                | 0.654                      | 0.085 (0.022, 0.148)                  | 0.009                | 0.863                      | 0.069 (-0.004, 0.142)                  | 0.066                | 0.179                      |
|                                   | Medium                                     | 0.037 (-0.026, 0.100)  | 0.255                |                            | 0.025 (-0.046, 0.096)                 | 0.500                |                            | 0.049 (-0.037, 0.135)                  | 0.264                |                            |
|                                   | High                                       | 0.020 (-0.058, 0.098)  | 0.622                |                            | 0.052 (-0.026, 0.130)                 | 0.193                |                            | 0.022 (-0.074, 0.118)                  | 0.650                |                            |
| RBC                               | Low                                        | -0.025 (-0.058, 0.008) | 0.137                | 0.328                      | -0.012 (-0.045, 0.021)                | 0.490                | 0.027                      | -4.90×10 <sup>-4</sup> (-0.042, 0.041) | 0.981                | 4.96×10 <sup>-5</sup>      |
|                                   | Medium                                     | -0.002 (-0.039, 0.035) | 0.919                |                            | 0.016 (-0.023, 0.055)                 | 0.438                |                            | 2.96×10 <sup>-4</sup> (-0.047, 0.047)  | 0.990                |                            |
|                                   | High                                       | 0.036 (-0.005, 0.077)  | 0.084                |                            | 0.059 (0.006, 0.112)                  | 0.028                |                            | 0.085 (0.028, 0.142)                   | 0.003                |                            |
| Hemoglobin                        | Low                                        | -0.036 (-1.281, 1.209) | 0.955                | 0.138                      | -0.292 (-1.515, 0.931)                | 0.640                | 0.012                      | 0.024 (-1.471, 1.519)                  | 0.975                | 0.068                      |
|                                   | Medium                                     | 0.060 (-0.847, 0.967)  | 0.897                |                            | 0.201 (-0.779, 1.181)                 | 0.687                |                            | 0.426 (-0.732, 1.584)                  | 0.472                |                            |
|                                   | High                                       | 0.577 (-0.638, 1.792)  | 0.353                |                            | 1.647 (0.120, 3.174)                  | 0.035                |                            | 1.524 (-0.215, 3.263)                  | 0.087                |                            |
| Hematocrit                        | Low                                        | 0.140 (-0.219, 0.499)  | 0.443                | 0.100                      | 0.153 (-0.186, 0.492)                 | 0.378                | 0.014                      | 0.235 (-0.184, 0.654)                  | 0.272                | 0.001                      |
|                                   | Medium                                     | -0.042 (-0.311, 0.227) | 0.757                |                            | 0.006 (-0.286, 0.298)                 | 0.970                |                            | -0.030 (-0.387, 0.327)                 | 0.868                |                            |
|                                   | High                                       | 0.406 (0.032, 0.780)   | 0.034                |                            | 0.555 (0.063, 1.047)                  | 0.028                |                            | 0.780 (0.247, 1.313)                   | 0.004                |                            |
| Platelet                          | Low                                        | 1.801 (-2.272, 5.874)  | 0.387                | 0.195                      | -0.486 (-4.776, 3.804)                | 0.825                | 0.482                      | 0.947 (-4.351, 6.245)                  | 0.726                | 0.770                      |
|                                   | Medium                                     | 2.148 (-1.568, 5.864)  | 0.258                |                            | -0.961 (-4.955, 3.033)                | 0.638                |                            | 2.085 (-2.445, 6.615)                  | 0.368                |                            |
|                                   | High                                       | -0.164 (-6.011, 5.683) | 0.956                |                            | -0.788 (-7.438, 5.862)                | 0.816                |                            | -1.472 (-9.522, 6.578)                 | 0.720                |                            |
| MPV                               | Low                                        | -0.073 (-0.151, 0.005) | 0.067                | 0.090                      | -0.017 (-0.123, 0.089)                | 0.754                | 0.220                      | 0.035 (-0.075, 0.145)                  | 0.529                | 0.617                      |
|                                   | Medium                                     | 0.024 (-0.052, 0.100)  | 0.533                |                            | 0.015 (-0.065, 0.095)                 | 0.720                |                            | 0.042 (-0.054, 0.138)                  | 0.396                |                            |
|                                   | High                                       | 0.023 (-0.067, 0.113)  | 0.609                |                            | 0.005 (-0.083, 0.093)                 | 0.909                |                            | 0.001 (-0.111, 0.113)                  | 0.983                |                            |

Note: Abbreviation: WBC, white blood cell; RBC, red blood cell; MPV, mean platelet volume.

<sup>a</sup> Subjects were divided to three groups (low, medium, and high) groups according to the tertile of the baseline hematologic parameters.

<sup>b</sup> Generalized linear model with adjustment for age, sex, factory location, BMI, smoking status, pack-years of smoking, and drinking status;

<sup>c</sup>  $P_{\text{interaction}}$  were calculated by modeling an interaction term of single BTX components and baseline hematologic parameters in generalized linear models, with adjustment for age, sex, factory location, BMI, smoking status, pack-years of smoking, and drinking status.



**Table S7.** Associations of BTX CE levels with decline in hematologic parameters stratified by age.

| Decline in<br>hematologic<br>parameters | Age group | Benzene                                |                      |                            | Toluene                                |                      |                            | Xylene                                |                      |                            |
|-----------------------------------------|-----------|----------------------------------------|----------------------|----------------------------|----------------------------------------|----------------------|----------------------------|---------------------------------------|----------------------|----------------------------|
|                                         |           | $\beta$ (95% CI)                       | $P_{\text{trend}}^a$ | $P_{\text{interaction}}^b$ | $\beta$ (95% CI)                       | $P_{\text{trend}}^a$ | $P_{\text{interaction}}^b$ | $\beta$ (95% CI)                      | $P_{\text{trend}}^a$ | $P_{\text{interaction}}^b$ |
| WBC                                     | ≤40       | 0.050 (-0.171, 0.271)                  | 0.654                | 0.892                      | 0.052 (-0.166, 0.270)                  | 0.639                | 0.602                      | 0.101 (-0.164, 0.366)                 | 0.452                | 0.436                      |
|                                         | >40       | 0.128 (-0.066, 0.322)                  | 0.196                |                            | -0.041 (-0.274, 0.192)                 | 0.729                |                            | -0.198 (-0.433, 0.037)                | 0.101                |                            |
| Neutrophils                             | ≤40       | -0.037 (-0.113, 0.039)                 | 0.345                | 0.089                      | -0.064 (-0.138, 0.010)                 | 0.095                | 0.064                      | -0.066 (-0.158, 0.026)                | 0.159                | 0.126                      |
|                                         | >40       | 0.139 (-1.60×10 <sup>-4</sup> , 0.278) | 0.050                |                            | 0.138 (-0.029, 0.305)                  | 0.104                |                            | 0.107 (-0.064, 0.278)                 | 0.218                |                            |
| Monocytes                               | ≤40       | 0.004 (-0.004, 0.012)                  | 0.342                | 0.050                      | -4.54×10 <sup>-4</sup> (-0.008, 0.007) | 0.912                | 0.371                      | 0.001 (-0.009, 0.011)                 | 0.908                | 0.687                      |
|                                         | >40       | 0.023 (0.005, 0.041)                   | 0.010                |                            | 0.008 (-0.014, 0.030)                  | 0.459                |                            | 0.006 (-0.016, 0.028)                 | 0.563                |                            |
| Lymphocytes                             | ≤40       | 0.043 (0.006, 0.080)                   | 0.025                | 0.704                      | 0.056 (0.019, 0.093)                   | 0.003                | 0.764                      | 0.075 (0.030, 0.120)                  | 0.001                | 0.300                      |
|                                         | >40       | 0.066 (-0.010, 0.142)                  | 0.088                |                            | 0.079 (-0.013, 0.171)                  | 0.095                |                            | 0.009 (-0.085, 0.103)                 | 0.850                |                            |
| RBC                                     | ≤40       | 0.009 (-0.011, 0.029)                  | 0.381                | 0.182                      | 0.018 (-0.002, 0.038)                  | 0.073                | 0.218                      | 0.016 (-0.008, 0.040)                 | 0.200                | 0.965                      |
|                                         | >40       | -0.018 (-0.061, 0.025)                 | 0.410                |                            | -0.005 (-0.058, 0.048)                 | 0.856                |                            | 0.031 (-0.024, 0.086)                 | 0.268                |                            |
| Hemoglobin                              | ≤40       | -0.201 (-0.834, 0.432)                 | 0.534                | 0.607                      | -0.051 (-0.674, 0.572)                 | 0.874                | 0.653                      | -0.042 (-0.801, 0.717)                | 0.913                | 0.133                      |
|                                         | >40       | 0.549 (-0.672, 1.770)                  | 0.379                |                            | 0.525 (-0.961, 2.011)                  | 0.489                |                            | 0.946 (-0.557, 2.449)                 | 0.218                |                            |
| Hematocrit                              | ≤40       | 0.082 (-0.083, 0.247)                  | 0.331                | 0.854                      | 0.122 (-0.041, 0.285)                  | 0.141                | 0.898                      | 0.108 (-0.090, 0.306)                 | 0.286                | 0.108                      |
|                                         | >40       | 0.257 (-0.155, 0.669)                  | 0.222                |                            | 0.268 (-0.236, 0.772)                  | 0.298                |                            | 0.510 (4.00×10 <sup>-4</sup> , 1.020) | 0.050                |                            |
| Platelet                                | ≤40       | 0.613 (-1.862, 3.088)                  | 0.628                | 0.369                      | 0.030 (-2.412, 2.472)                  | 0.981                | 0.844                      | 0.844 (-2.125, 3.813)                 | 0.578                | 0.505                      |
|                                         | >40       | 3.081 (-2.548, 8.710)                  | 0.284                |                            | -1.117 (-7.995, 5.761)                 | 0.750                |                            | -0.699 (-7.675, 6.277)                | 0.844                |                            |
| MPV                                     | ≤40       | -0.003 (-0.046, 0.040)                 | 0.875                | 0.257                      | -0.010 (-0.051, 0.031)                 | 0.632                | 0.714                      | -0.018 (-0.069, 0.033)                | 0.487                | 0.070                      |
|                                         | >40       | -0.044 (-0.138, 0.050)                 | 0.362                |                            | 0.020 (-0.096, 0.136)                  | 0.730                |                            | 0.086 (-0.032, 0.204)                 | 0.152                |                            |

Note: Abbreviation: WBC, white blood cell; RBC, red blood cell; MPV, mean platelet volume.

<sup>a</sup> Generalized linear model with adjustment for sex, factory location, BMI, smoking status, pack-years of smoking, drinking status, and the corresponding baseline hematologic parameters;

<sup>b</sup>  $P_{\text{interaction}}$  were calculated by modeling an interaction term of single BTX components and age groups in generalized linear models, with adjustment for sex, factory location, BMI, smoking status, pack-years of smoking, drinking status, and the corresponding baseline hematologic parameters.

**Table S8.** Associations of BTX CE levels with decline in hematologic parameters stratified by sex.

| Decline in<br>hematologic parameters | Sex    | Benzene                                        |                      |                            | Toluene                |                      |                            | Xylene                  |                      |                            |
|--------------------------------------|--------|------------------------------------------------|----------------------|----------------------------|------------------------|----------------------|----------------------------|-------------------------|----------------------|----------------------------|
|                                      |        | $\beta$ (95% CI)                               | $P_{\text{trend}}^a$ | $P_{\text{interaction}}^b$ | $\beta$ (95% CI)       | $P_{\text{trend}}^a$ | $P_{\text{interaction}}^b$ | $\beta$ (95% CI)        | $P_{\text{trend}}^a$ | $P_{\text{interaction}}^b$ |
| WBC                                  | Female | 0.150 (-0.052, 0.352)                          | 0.145                | 0.587                      | 0.143 (-0.086, 0.372)  | 0.223                | 0.802                      | 0.073 (-0.148, 0.294)   | 0.520                | 0.480                      |
|                                      | Male   | 0.040 (-0.174, 0.254)                          | 0.714                |                            | 0.004 (-0.223, 0.231)  | 0.975                |                            | 0.033 (-0.253, 0.319)   | 0.819                |                            |
| Neutrophils                          | Female | 0.078 (-0.091, 0.247)                          | 0.366                | 0.668                      | 0.002 (-0.190, 0.194)  | 0.987                | 0.601                      | -0.013 (-0.195, 0.169)  | 0.887                | 0.160                      |
|                                      | Male   | 0.008 (-0.074, 0.090)                          | 0.843                |                            | -0.025 (-0.111, 0.061) | 0.566                |                            | -0.011 (-0.121, 0.099)  | 0.845                |                            |
| Monocytes                            | Female | 0.020 (4.00 $\times$ 10 <sup>-4</sup> , 0.040) | 0.042                | 0.818                      | 0.017 (-0.005, 0.039)  | 0.126                | 0.627                      | 0.008 (-0.014, 0.030)   | 0.437                | 0.815                      |
|                                      | Male   | 0.010 (2.00 $\times$ 10 <sup>-4</sup> , 0.020) | 0.042                |                            | 0.001 (-0.009, 0.011)  | 0.868                |                            | 0.004 (-0.010, 0.018)   | 0.586                |                            |
| Lymphocytes                          | Female | 0.036 (-0.035, 0.107)                          | 0.309                | 0.618                      | 0.059 (-0.019, 0.137)  | 0.145                | 0.482                      | 0.044 (-0.032, 0.120)   | 0.254                | 0.001                      |
|                                      | Male   | 0.041 (-0.002, 0.084)                          | 0.064                |                            | 0.052 (0.007, 0.097)   | 0.026                |                            | 0.061 (0.002, 0.120)    | 0.041                |                            |
| RBC                                  | Female | -0.035 (-0.086, 0.016)                         | 0.175                | 0.145                      | -0.021 (-0.080, 0.038) | 0.471                | 0.038                      | -0.026 (-0.081, 0.029)  | 0.359                | 0.001                      |
|                                      | Male   | 0.005 (-0.019, 0.029)                          | 0.680                |                            | 0.018 (-0.007, 0.043)  | 0.155                |                            | 0.032 (0.001, 0.063)    | 0.044                |                            |
| Hemoglobin                           | Female | -0.931 (-2.652, 0.790)                         | 0.290                | 0.135                      | -1.031 (-3.001, 0.939) | 0.306                | 0.080                      | -0.751 (-2.640, 1.138)  | 0.437                | 0.036                      |
|                                      | Male   | 0.405 (-0.252, 1.062)                          | 0.227                |                            | 0.523 (-0.179, 1.225)  | 0.145                |                            | 1.003 (0.125, 1.881)    | 0.026                |                            |
| Hematocrit                           | Female | -0.347 (-0.917, 0.223)                         | 0.235                | 0.033                      | -0.420 (-1.067, 0.227) | 0.204                | 0.011                      | -0.249 (-0.870, 0.372)  | 0.434                | 0.033                      |
|                                      | Male   | 0.206 (0.022, 0.390)                           | 0.029                |                            | 0.271 (0.073, 0.469)   | 0.007                |                            | 0.401 (0.150, 0.652)    | 0.002                |                            |
| Platelet                             | Female | -3.061 (-9.533, 3.411)                         | 0.355                | 0.059                      | -2.159 (-9.546, 5.228) | 0.567                | 0.170                      | -2.953 (-10.033, 4.127) | 0.414                | 0.082                      |
|                                      | Male   | 2.553 (-0.332, 5.438)                          | 0.083                |                            | 0.556 (-2.527, 3.639)  | 0.724                |                            | 2.595 (-1.317, 6.507)   | 0.194                |                            |
| MPV                                  | Female | 0.043 (-0.061, 0.147)                          | 0.414                | 0.494                      | -0.023 (-0.141, 0.095) | 0.702                | 0.587                      | 0.047 (-0.065, 0.159)   | 0.414                | 0.913                      |
|                                      | Male   | -0.005 (-0.054, 0.044)                         | 0.831                |                            | 0.014 (-0.039, 0.067)  | 0.600                |                            | 0.022 (-0.045, 0.089)   | 0.517                |                            |

Note: Abbreviation: WBC, white blood cell; RBC, red blood cell; MPV, mean platelet volume.

<sup>a</sup>Generalized linear model with adjustment for age, factory location, BMI, smoking status, pack-years of smoking, drinking status, and the corresponding baseline hematologic parameters;

<sup>b</sup> $P_{\text{interaction}}$  were calculated by modeling an interaction term of single BTX components and sex in generalized linear models, with adjustment for age, factory location, BMI, smoking status, pack-years of smoking, drinking status, and the corresponding baseline hematologic parameters.

**Table S9.** Associations of BTX CE levels with decline in hematologic parameters stratified by smoking status.

| Decline in<br>hematologic<br>parameters | Smoking<br>status | Benzene                |                      |                            | Toluene                |                      |                            | Xylene                 |                      |                            |
|-----------------------------------------|-------------------|------------------------|----------------------|----------------------------|------------------------|----------------------|----------------------------|------------------------|----------------------|----------------------------|
|                                         |                   | $\beta$ (95% CI)       | $P_{\text{trend}}^a$ | $P_{\text{interaction}}^b$ | $\beta$ (95% CI)       | $P_{\text{trend}}^a$ | $P_{\text{interaction}}^b$ | $\beta$ (95% CI)       | $P_{\text{trend}}^a$ | $P_{\text{interaction}}^b$ |
| WBC                                     | Nonsmoker         | 0.002 (-0.239, 0.243)  | 0.990                | 0.991                      | -0.045 (-0.304, 0.214) | 0.733                | 0.738                      | -0.022 (-0.326, 0.282) | 0.889                | 0.432                      |
|                                         | Smoker            | 0.171 (-0.031, 0.373)  | 0.099                |                            | 0.166 (-0.050, 0.382)  | 0.131                |                            | 0.179 (-0.095, 0.453)  | 0.202                |                            |
| Neutrophils                             | Nonsmoker         | -0.012 (-0.096, 0.072) | 0.779                | 0.707                      | -0.064 (-0.154, 0.026) | 0.171                | 0.308                      | -0.035 (-0.143, 0.073) | 0.520                | 0.169                      |
|                                         | Smoker            | 0.080 (-0.059, 0.219)  | 0.265                |                            | 0.050 (-0.099, 0.199)  | 0.512                |                            | 0.030 (-0.160, 0.220)  | 0.761                |                            |
| Monocytes                               | Nonsmoker         | 0.014 (0.004, 0.024)   | 0.007                | 0.909                      | 0.007 (-0.003, 0.017)  | 0.207                | 0.526                      | 0.004 (-0.008, 0.016)  | 0.545                | 0.762                      |
|                                         | Smoker            | 0.008 (-0.008, 0.024)  | 0.374                |                            | -0.004 (-0.022, 0.014) | 0.689                |                            | 0.009 (-0.015, 0.033)  | 0.425                |                            |
| Lymphocytes                             | Nonsmoker         | 0.029 (-0.016, 0.074)  | 0.204                | 0.836                      | 0.046 (-0.001, 0.093)  | 0.059                | 0.873                      | 0.036 (-0.021, 0.093)  | 0.205                | 0.072                      |
|                                         | Smoker            | 0.053 (-0.018, 0.124)  | 0.141                |                            | 0.053 (-0.021, 0.127)  | 0.163                |                            | 0.085 (-0.009, 0.179)  | 0.079                |                            |
| RBC                                     | Nonsmoker         | 0.005 (-0.020, 0.030)  | 0.685                | 0.181                      | 0.023 (-0.004, 0.050)  | 0.109                | 0.241                      | 0.023 (-0.010, 0.056)  | 0.174                | 0.826                      |
|                                         | Smoker            | -0.021 (-0.058, 0.016) | 0.258                |                            | -0.014 (-0.053, 0.025) | 0.485                |                            | -0.002 (-0.053, 0.049) | 0.923                |                            |
| Hemoglobin                              | Nonsmoker         | 0.103 (-0.654, 0.860)  | 0.790                | 0.708                      | 0.225 (-0.594, 1.044)  | 0.590                | 0.655                      | 0.485 (-0.466, 1.436)  | 0.318                | 0.743                      |
|                                         | Smoker            | 0.054 (-1.065, 1.173)  | 0.925                |                            | 0.161 (-1.039, 1.361)  | 0.792                |                            | 0.309 (-1.224, 1.842)  | 0.693                |                            |
| Hematocrit                              | Nonsmoker         | 0.163 (-0.072, 0.398)  | 0.176                | 0.948                      | 0.250 (-0.005, 0.505)  | 0.054                | 0.716                      | 0.257 (-0.043, 0.557)  | 0.093                | 0.640                      |
|                                         | Smoker            | 0.089 (-0.201, 0.379)  | 0.551                |                            | 0.053 (-0.259, 0.365)  | 0.738                |                            | 0.278 (-0.118, 0.674)  | 0.171                |                            |
| Platelet                                | Nonsmoker         | 1.300 (-1.873, 4.473)  | 0.422                | 0.855                      | 0.357 (-3.077, 3.791)  | 0.839                | 0.380                      | 1.120 (-2.922, 5.162)  | 0.587                | 0.263                      |
|                                         | Smoker            | 1.318 (-3.366, 6.002)  | 0.582                |                            | -1.298 (-6.300, 3.704) | 0.611                |                            | -0.735 (-7.109, 5.639) | 0.821                |                            |
| MPV                                     | Nonsmoker         | -0.009 (-0.064, 0.046) | 0.761                | 0.633                      | 0.010 (-0.049, 0.069)  | 0.748                | 0.388                      | 0.008 (-0.063, 0.079)  | 0.818                | 0.264                      |
|                                         | Smoker            | 0.022 (-0.052, 0.096)  | 0.554                |                            | -0.003 (-0.081, 0.075) | 0.938                |                            | 0.064 (-0.036, 0.164)  | 0.211                |                            |

Note: Abbreviation: WBC, white blood cell; RBC, red blood cell; MPV, mean platelet volume.

<sup>a</sup> Generalized linear model with adjustment for age, sex, factory location, BMI, drinking status, and the corresponding baseline hematologic parameters;

<sup>b</sup>  $P_{\text{interaction}}$  were calculated by modeling an interaction term of single BTX components and smoking status in generalized linear models, with adjustment for age, sex, factory location, BMI, drinking status, and the corresponding baseline hematologic parameters.

**Table S10.** Associations of BTX CE levels with decline in hematologic parameters stratified by drinking status.

| Decline in<br>hematologic<br>parameters | Drinking<br>status | Benzene                |                         |                               | Toluene                |                      |                            | Xylene                                 |                         |                               |
|-----------------------------------------|--------------------|------------------------|-------------------------|-------------------------------|------------------------|----------------------|----------------------------|----------------------------------------|-------------------------|-------------------------------|
|                                         |                    | $\beta$ (95% CI)       | $P_{\text{trend}}$<br>a | $P_{\text{interaction}}$<br>b | $\beta$ (95% CI)       | $P_{\text{trend}}^a$ | $P_{\text{interaction}}^b$ | $\beta$ (95% CI)                       | $P_{\text{trend}}$<br>a | $P_{\text{interaction}}$<br>b |
| WBC                                     | Nondrinker         | 0.064 (-0.065, 0.193)  | 0.338                   | 0.954                         | -0.018 (-0.157, 0.121) | 0.806                | 0.653                      | -0.048 (-0.205, 0.109)                 | 0.552                   | 0.671                         |
|                                         | Drinker            | 0.017 (-0.330, 0.364)  | 0.925                   |                               | 0.049 (-0.323, 0.421)  | 0.798                |                            | 0.116 (-0.364, 0.596)                  | 0.636                   |                               |
| Neutrophils                             | Nondrinker         | 0.069 (-0.031, 0.169)  | 0.176                   | 0.048                         | -0.008 (-0.116, 0.100) | 0.889                | 0.234                      | -0.004 (-0.126, 0.118)                 | 0.947                   | 0.445                         |
|                                         | Drinker            | -0.044 (-0.152, 0.064) | 0.420                   |                               | -0.046 (-0.162, 0.070) | 0.435                |                            | -0.040 (-0.191, 0.111)                 | 0.604                   |                               |
| Monocytes                               | Nondrinker         | 0.016 (0.004, 0.028)   | 0.007                   | 0.294                         | 0.003 (-0.009, 0.015)  | 0.660                | 0.837                      | 0.006 (-0.008, 0.020)                  | 0.411                   | 0.643                         |
|                                         | Drinker            | 0.008 (-0.004, 0.020)  | 0.222                   |                               | 0.004 (-0.010, 0.018)  | 0.525                |                            | 0.005 (-0.013, 0.023)                  | 0.555                   |                               |
| Lymphocytes                             | Nondrinker         | 0.045 (-0.006, 0.096)  | 0.081                   | 0.030                         | 0.068 (0.013, 0.123)   | 0.014                | 0.033                      | 0.020 (-0.043, 0.083)                  | 0.522                   | 0.328                         |
|                                         | Drinker            | 0.025 (-0.030, 0.080)  | 0.364                   |                               | 0.026 (-0.033, 0.085)  | 0.378                |                            | 0.079 (0.005, 0.153)                   | 0.04                    |                               |
| RBC                                     | Nondrinker         | 0.005 (-0.026, 0.036)  | 0.747                   | 0.675                         | 0.018 (-0.017, 0.053)  | 0.302                | 0.834                      | 0.028 (-0.011, 0.067)                  | 0.158                   | 0.584                         |
|                                         | Drinker            | -0.011 (-0.038, 0.016) | 0.434                   |                               | 0.005 (-0.024, 0.034)  | 0.731                |                            | -1.49 $\times 10^{-4}$ (-0.037, 0.037) | 0.994                   |                               |
| Hemoglobin                              | Nondrinker         | -0.140 (-1.046, 0.766) | 0.761                   | 0.738                         | -0.013 (-0.989, 0.963) | 0.979                | 0.723                      | 0.400 (-0.692, 1.492)                  | 0.473                   | 0.858                         |
|                                         | Drinker            | 0.371 (-0.487, 1.229)  | 0.398                   |                               | 0.501 (-0.430, 1.432)  | 0.293                |                            | 0.494 (-0.704, 1.692)                  | 0.419                   |                               |
| Hematocrit                              | Nondrinker         | 0.072 (-0.210, 0.354)  | 0.617                   | 0.502                         | 0.100 (-0.204, 0.404)  | 0.521                | 0.278                      | 0.255 (-0.090, 0.600)                  | 0.148                   | 0.550                         |
|                                         | Drinker            | 0.137 (-0.096, 0.370)  | 0.250                   |                               | 0.222 (-0.029, 0.473)  | 0.084                |                            | 0.201 (-0.124, 0.526)                  | 0.226                   |                               |
| Platelet                                | Nondrinker         | 1.900 (-1.753, 5.553)  | 0.309                   | 0.552                         | 0.121 (-3.836, 4.078)  | 0.952                | 0.635                      | 0.354 (-4.119, 4.827)                  | 0.877                   | 0.696                         |
|                                         | Drinker            | 0.934 (-2.804, 4.672)  | 0.625                   |                               | -0.345 (-4.375, 3.685) | 0.867                |                            | 1.075 (-4.127, 6.277)                  | 0.686                   |                               |
| MPV                                     | Nondrinker         | -0.001 (-0.064, 0.062) | 0.986                   | 0.736                         | 0.025 (-0.042, 0.092)  | 0.473                | 0.435                      | 0.016 (-0.060, 0.092)                  | 0.683                   | 0.499                         |
|                                         | Drinker            | 0.013 (-0.050, 0.076)  | 0.683                   |                               | -0.002 (-0.071, 0.067) | 0.955                |                            | 0.057 (-0.031, 0.145)                  | 0.206                   |                               |

Note: Abbreviation: WBC, white blood cell; RBC, red blood cell; MPV, mean platelet volume.

<sup>a</sup> Generalized linear model with adjustment for age, sex, factory location, BMI, smoking status, pack-years of smoking, the corresponding baseline hematologic parameters, and other BTX components;

<sup>b</sup>  $P_{\text{interaction}}$  were calculated by modeling an interaction term of single BTX components and drinking status in generalized linear models, with adjustment for age, sex, factory location, BMI, smoking status, pack-years of smoking, and the corresponding baseline hematologic parameters.

**Table S11.** Associations of BTX CE levels with decline in hematologic parameters stratified by BMI (kg/m<sup>2</sup>).

| Decline in<br>hematologic parameters | BMI groups | Benzene                |                      |                            | Toluene                |                      |                            | Xylene                 |                      |                            |
|--------------------------------------|------------|------------------------|----------------------|----------------------------|------------------------|----------------------|----------------------------|------------------------|----------------------|----------------------------|
|                                      |            | $\beta$ (95% CI)       | $P_{\text{trend}}^a$ | $P_{\text{interaction}}^b$ | $\beta$ (95% CI)       | $P_{\text{trend}}^a$ | $P_{\text{interaction}}^b$ | $\beta$ (95% CI)       | $P_{\text{trend}}^a$ | $P_{\text{interaction}}^b$ |
| WBC                                  | <24        | -0.005 (-0.285, 0.275) | 0.974                | 0.403                      | -0.077 (-0.387, 0.233) | 0.624                | 0.253                      | -0.071 (-0.418, 0.276) | 0.690                | 0.436                      |
|                                      | ≥24        | 0.118 (-0.025, 0.261)  | 0.106                |                            | 0.141 (-0.008, 0.290)  | 0.066                |                            | 0.174 (-0.020, 0.368)  | 0.079                |                            |
| Neutrophils                          | <24        | -0.017 (-0.111, 0.077) | 0.722                | 0.012                      | -0.101 (-0.205, 0.003) | 0.057                | 0.001                      | -0.080 (-0.198, 0.038) | 0.177                | 0.057                      |
|                                      | ≥24        | 0.065 (-0.049, 0.179)  | 0.263                |                            | 0.070 (-0.050, 0.190)  | 0.248                |                            | 0.083 (-0.072, 0.238)  | 0.291                |                            |
| Monocytes                            | <24        | 0.010 (-0.002, 0.022)  | 0.103                | 0.323                      | 0.002 (-0.012, 0.016)  | 0.742                | 0.772                      | 0.005 (-0.009, 0.019)  | 0.508                | 0.370                      |
|                                      | ≥24        | 0.013 (0.001, 0.025)   | 0.030                |                            | 0.005 (-0.007, 0.017)  | 0.474                |                            | 0.005 (-0.011, 0.021)  | 0.587                |                            |
| Lymphocytes                          | <24        | 0.020 (-0.027, 0.067)  | 0.400                | 0.291                      | 0.016 (-0.037, 0.069)  | 0.554                | 0.029                      | 0.010 (-0.049, 0.069)  | 0.739                | 0.023                      |
|                                      | ≥24        | 0.051 (-0.010, 0.112)  | 0.100                |                            | 0.086 (0.023, 0.149)   | 0.008                |                            | 0.093 (0.011, 0.175)   | 0.027                |                            |
| RBC                                  | <24        | 0.003 (-0.024, 0.030)  | 0.823                | 0.632                      | 0.018 (-0.013, 0.049)  | 0.263                | 0.980                      | 0.014 (-0.021, 0.049)  | 0.435                | 0.296                      |
|                                      | ≥24        | -0.014 (-0.045, 0.017) | 0.382                |                            | 0.002 (-0.031, 0.035)  | 0.928                |                            | 0.015 (-0.028, 0.058)  | 0.511                |                            |
| Hemoglobin                           | <24        | 0.495 (-0.330, 1.320)  | 0.239                | 0.082                      | 0.417 (-0.500, 1.334)  | 0.373                | 0.356                      | 0.349 (-0.672, 1.370)  | 0.504                | 0.649                      |
|                                      | ≥24        | -0.448 (-1.397, 0.501) | 0.355                |                            | -0.113 (-1.109, 0.883) | 0.824                |                            | 0.537 (-0.753, 1.827)  | 0.415                |                            |
| Hematocrit                           | <24        | 0.285 (0.038, 0.532)   | 0.024                | 0.342                      | 0.257 (-0.021, 0.535)  | 0.070                | 0.812                      | 0.234 (-0.078, 0.546)  | 0.142                | 0.271                      |
|                                      | ≥24        | -0.042 (-0.316, 0.232) | 0.766                |                            | 0.121 (-0.163, 0.405)  | 0.406                |                            | 0.314 (-0.054, 0.682)  | 0.097                |                            |
| Platelet                             | <24        | 0.508 (-3.100, 4.116)  | 0.783                | 0.261                      | -2.718 (-6.760, 1.324) | 0.188                | 0.052                      | -1.780 (-6.327, 2.767) | 0.443                | 0.298                      |
|                                      | ≥24        | 2.438 (-1.268, 6.144)  | 0.198                |                            | 2.848 (-1.001, 6.697)  | 0.148                |                            | 4.499 (-0.491, 9.489)  | 0.078                |                            |
| MPV                                  | <24        | 0.024 (-0.037, 0.085)  | 0.444                | 0.375                      | 0.036 (-0.033, 0.105)  | 0.299                | 0.411                      | 0.073 (-0.003, 0.149)  | 0.062                | 0.507                      |
|                                      | ≥24        | -0.026 (-0.089, 0.037) | 0.421                |                            | -0.021 (-0.086, 0.044) | 0.516                |                            | -0.036 (-0.120, 0.048) | 0.403                |                            |

Note: Abbreviation: WBC, white blood cell; RBC, red blood cell; MPV, mean platelet volume.

<sup>a</sup> Generalized linear model with adjustment for age, sex, factory location, smoking status, pack-years of smoking, drinking status, and the corresponding baseline hematologic parameters;

<sup>b</sup>  $P_{\text{interaction}}$  were calculated by modeling an interaction term of single BTX components and BMI groups in generalized linear models, with adjustment for age, sex, factory location, smoking status, pack-years of smoking, drinking status, and the corresponding baseline hematologic parameters.

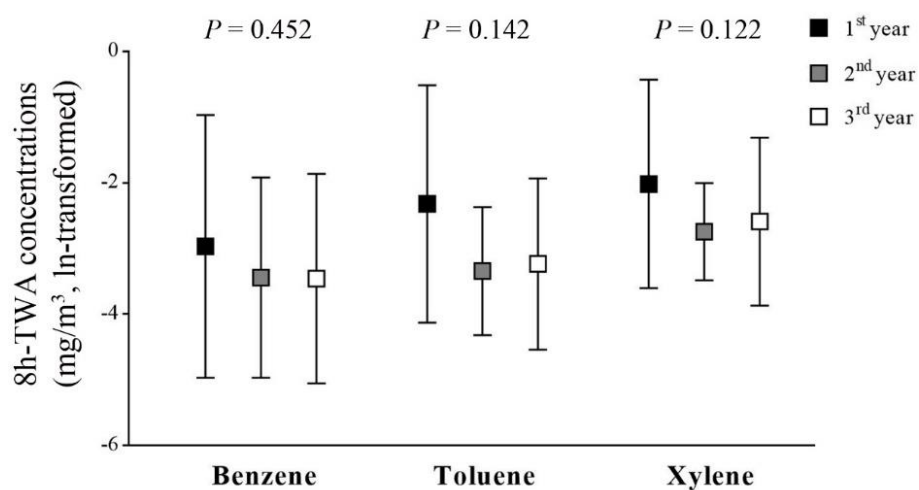

**Figure S1. Comparisons of annual average BTX 8h-TWA concentrations using generalized estimating equation models.**

Note: Abbreviation: 8h-TWA, 8-hour time-weighted average concentrations.

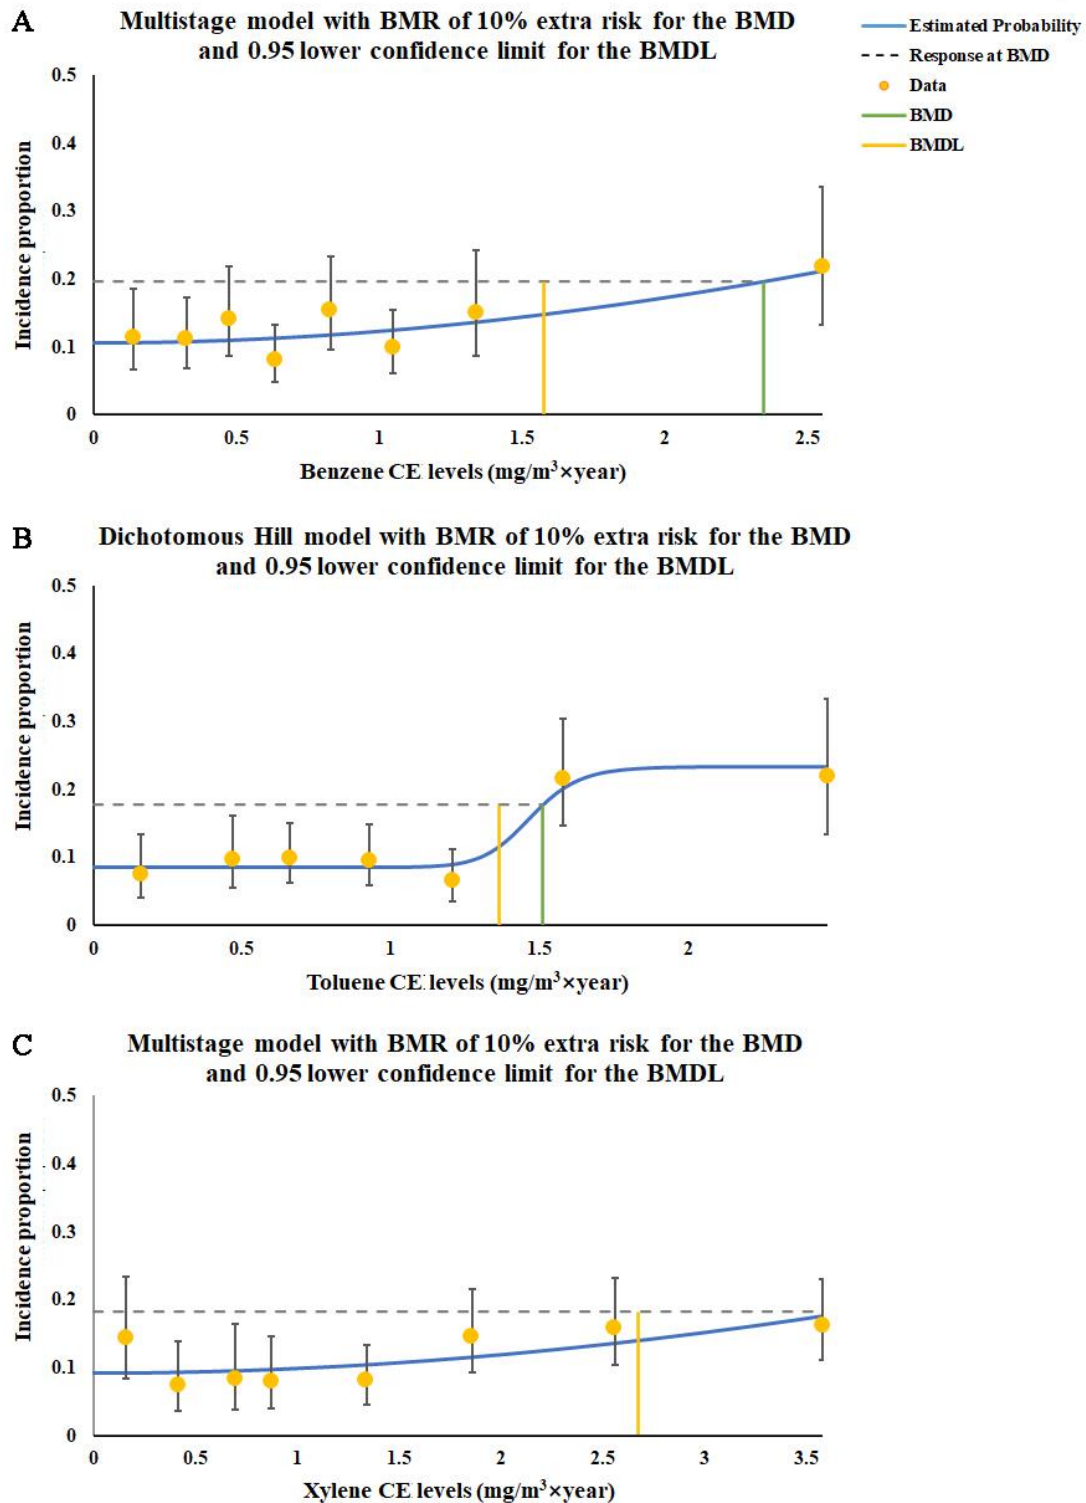

**Figure S2. Dose-response curves and estimated BMD and BMDL of CE levels of benzene (A), toluene (B), and xylene (C) for the incidence proportions of hematological damage.**

Note: Abbreviation: BMR, benchmark response; BMD, benchmark doses;

BMDL, lower confidence limit of BMD; CE, cumulative exposure.

The X axis described the BTX CE levels ( $\text{mg}/\text{m}^3 \times \text{year}$ ), and the Y axis described the incidence proportions of hematological damages.
